# Supplementary material
Source: HighWire-hosted journal article supplement (http://www.qdcxjkg.com/highwire/filestream/113567/field_highwire_adjunct_files/0/42-1_CME_ONLINE.pdf)
Supplement: 42-1_CME_ONLINE.pdf [file 42-1_CME_ONLINE.pdf]

# CME Credit Application Form

## (1 CME credit)

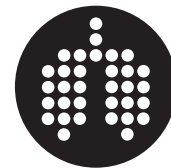

To receive CME credits, read the CME article in this issue, indicate the correct responses to the educational questions and complete the requested information. This form is also available in electronic format at [www.erj.ersjournals.com/current.dtl](http://www.erj.ersjournals.com/current.dtl). To return your application, you can either:

- use this form and return it completed to ERS Publications Office, 442 Glossop Road, Sheffield, S10 2PX, UK; fax to +44-114-2665064; or e-mail to [info@ersj.org.uk](mailto:info@ersj.org.uk)
- fill in the online form at [www.erj.ersjournals.com/current.dtl](http://www.erj.ersjournals.com/current.dtl)

Certificates will be e-mailed to the address filled in below. Please allow 4 weeks for processing.

**CME credit applications are now free of charge.**

### Applicant personal details.

ERS Membership No. (if known): ..... Date of Birth (DD/MM/YYYY): .....

Family Name: ..... First Name: .....

Mailing Address: .....

.....

Postal Code: ..... City: ..... Country: .....

Telephone: + ..... E-mail: .....

### Educational questions.

**"Clinical phenotypes of Italian and Spanish patients with  $\alpha_1$ -antitrypsin deficiency"**

**1. Which of the following statements concerning  $\alpha_1$ -antitrypsin deficiency (AATD) is true?**

- It is associated with increased risk of pulmonary emphysema.  It is associated with increased risk of bronchial asthma.  It is associated with increased risk of pneumonia.  It is associated with increased risk of lung cancer

**2. Which of the following statements concerning AATD is false?**

- There are more than 120 genetic variants of AAT.  The most frequent deficient allele is called Z.  The main target of the AAT is neutrophil elastase.  The most frequent allele characterised by normal serum levels of AAT is called S.

**3. Which of the following statements concerning clinical characteristics of patients with AATD is true?**

- Patients with emphysema and AATD use to be older at onset of symptoms than patients with smoking COPD.  The most frequent reason for AATD diagnosis is liver disease.  Around 20% of patients with AATD have history of recurrent pneumonia.  More than 50% of patients with AATD have bronchiectasis.

**4. Of the following statements concerning clinical characteristics of patients with AATD is false?**

- Emphysema is the most frequent pulmonary manifestation of AATD.  Around 30–40% of patients with pulmonary disease and AATD in Spain and Italy are receiving augmentation therapy with intravenous AAT.  Patients with AATD and overlap with asthma have more preserved FEV1 (% predicted) compared with other phenotypes.  Patients with PI\*SZ phenotype have more preserved lung function compared with PI\*ZZ

**5. Which of the following statements concerning AATD registries is false?**

- Registries are needed to collect enough information for rare diseases such as AATD.  Registries of AATD include heterozygous PI\*MZ.  Spanish and Italian registries use the same database.  Spanish and Italian registries were founded in the 1990s.
